# Supplementary material for: Phenomenological Changes Associated with Deep Brain Stimulation for Obsessive Compulsive Disorder: A Cognitive Appraisal Model of Recovery
Source: MDPI journal article supplement (doi:10.3390/brainsci13101444), 2023-10-10
Supplement: s1 [file s1]

In subsequent questions, when we discuss changes that have occurred, it would be useful if you can provide specific examples. You can go into as much detail as you like. I want you to consider changes that have affected \_\_\_\_\_ in a positive way, and changes that have affected \_\_\_\_\_ in a negative way. If there are changes that seem idiosyncratic or insignificant, these may indeed be important, and I would like to hear about all of the changes you are aware of. Throughout 2020, the COVID lockdown may have affected \_\_\_\_\_ thoughts, behaviours and actions in relation to the following questions; please think back and refer to times before COVID-19 lockdown.

## Background

1. What is your relationship to \_\_\_\_\_?
2. How many hours would you care for their needs
  - i) Before DBS?
  - ii) After DBS?
3. Did/ have you lived with \_\_\_\_\_
  - i) Before DBS?
  - ii) After DBS?
4. What did/does your care consist of
  - i) Before DBS?
  - ii) After DBS?

## Effects of DBS on the self

5. Have aspects of \_\_\_\_\_ **thoughts, mood or behaviour** changed?
6. Do you think there have been changes to **who** \_\_\_\_\_ **is** as a person, if so how do you evaluate these changes?

## Effects of DBS on experience of the external world

7. Has \_\_\_\_\_ **perspective** of the world and how they **engages** with, and **experience** the world around them changed?

## Effects of DBS on the interpersonal world

8. Has the way in which \_\_\_\_\_ **interacts** with others changed, if so, how has this affected their relationships, including with yourself?

## Effect of DBS towards attitudes of wellbeing

9. What is your overall impression of DBS therapy and the associated changes to \_\_\_\_\_ **wellbeing** and **quality of life**?

## Effect of DBS on carers

10. How have changes to \_\_\_\_\_ way of being following DBS affected **your life**?

### Final comments

11. Please discuss any **recommendations** that may improve DBS therapy at any stage of the clinical care process for DBS patients or carers
12. Do you have any **final comments** that are important \_\_\_\_\_ and your experience of DBS treatment?
