# Supplementary material for: Phenomenological Changes Associated with Deep Brain Stimulation for Obsessive Compulsive Disorder: A Cognitive Appraisal Model of Recovery
Source: Brain Sci. 2023 Oct 10;13(10):1444. doi: 10.3390/brainsci13101444 (PMC10605199; doi:10.3390/brainsci13101444)
Supplement: Supplementary file 1 [file brainsci-13-01444-s001.zip]

Archive with 4 entries (4 files):
- Supplementary/Supplementary 1_Participant Interview.pdf
- Supplementary/Supplementary 2_Carer interview.pdf
- Supplementary/Supplementary 3_COREQ table.pdf
- Supplementary/Supplementary 4_Thematic map stages.pdf
