# Supplementary figures and images for: Phenomenological Changes Associated with Deep Brain Stimulation for Obsessive Compulsive Disorder: A Cognitive Appraisal Model of Recovery
Source: MDPI journal article supplement (doi:10.3390/brainsci13101444), 2023-10-10

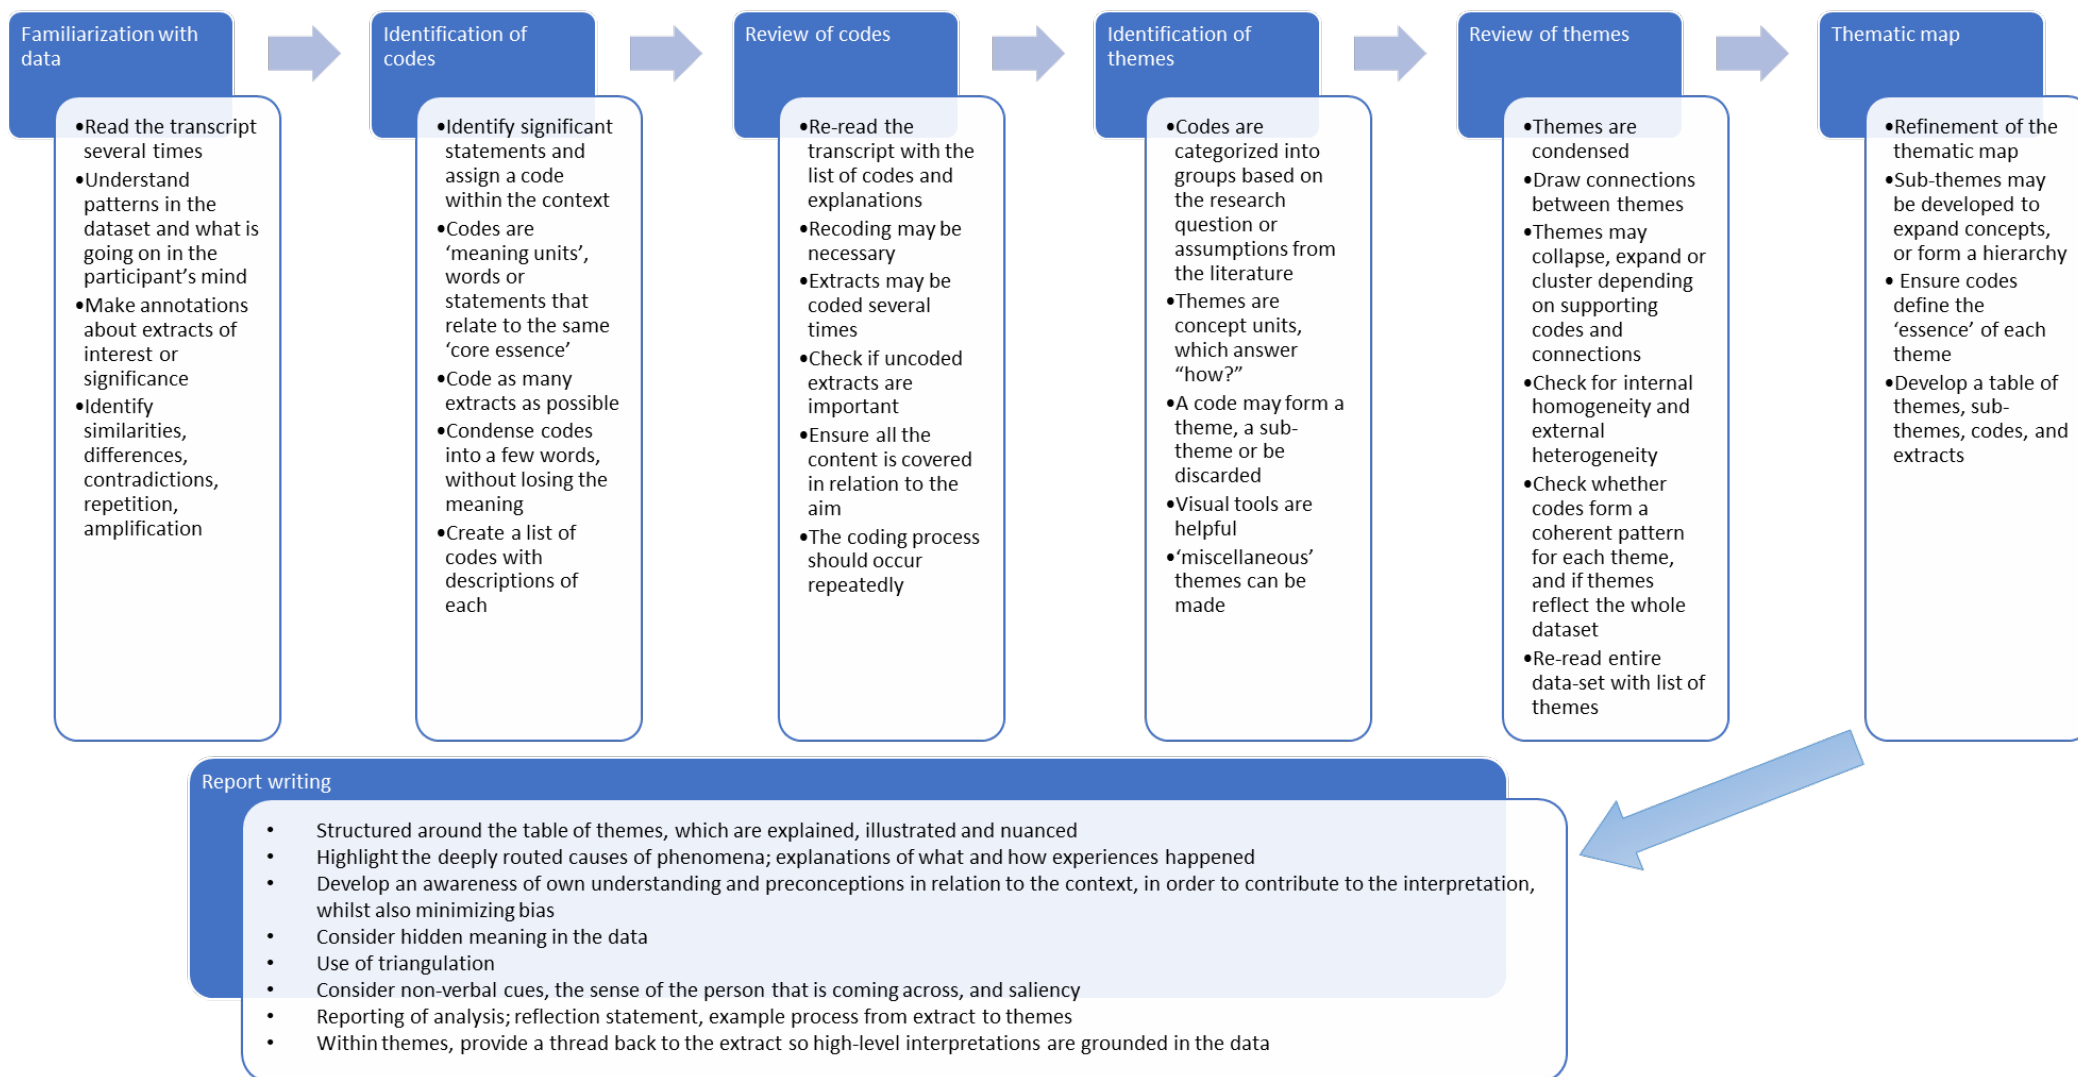

Supplement: s1 [file s1]
